# Supplementary material for: Multivalent Sialyllactose-Levan-Conjugated Gold Nanoparticles for Efficient Interaction with and Colorimetric Detection of Influenza A Virus
Source: MDPI journal article supplement (doi:10.3390/chemosensors9070186), 2021-07-19
Supplement: s1 [file s1]

## <Supplementary data>

### Multivalent sialyllactose-levan-conjugated gold nanoparticles for efficient interaction with and colorimetric detection of influenza A virus

Sun-Jung Kim <sup>1,\*</sup>, Pan Kee Bae <sup>1</sup> and Yong-Beom Shin <sup>1,2,\*</sup>

<sup>1</sup> BioNano Health Guard Research Center, 125 Gwahak-ro, Yuseong-gu, Daejeon 305-806, Republic of Korea

<sup>2</sup> Bionano Research Center, Korea Research Institute of Bioscience and Biotechnology (KRIBB), 125 Gwahak-ro, Yuseong-gu, Daejeon 305-806, Republic of Korea

\* Correspondence: kimsj@kribb.re.kr; ybshin@kribb.re.kr; Tel.: +82-879-8463

|                      | PCR                                         | Sialyllactose levan AuNPs                 |
|----------------------|---------------------------------------------|-------------------------------------------|
| <b>Method</b>        | RNA detection                               | Colorimetric detection                    |
| <b>Assay time</b>    | 6~8 h                                       | 5 min                                     |
| <b>Equipment</b>     | PCR machine                                 | No machine                                |
| <b>Advantages</b>    | High sensitivity and specificity            | Simple detection and short detection time |
| <b>Disadvantages</b> | High cost, need tools and skilled personnel | Low sensitive and specificity             |

**Table S1. Comparison of PCR and sialyllactose levan AuNPs method**

| Nanomaterials      | capture probe           | Influenza virus subtype | Detection method       | LOD                                                              | Detection time | Reference  |
|--------------------|-------------------------|-------------------------|------------------------|------------------------------------------------------------------|----------------|------------|
| Magnetite particle | Antibody                | H5N2                    | MALD-TOF-MS            | $\sim 10^3$<br>EID <sub>50</sub> /ml<br>( $3.5 \times 10^4$ PFU) | hours          | [24]       |
| Quantum dot        | Antibody                | H5N1                    | Fluorescence detection | 1~200nM                                                          | hours          | [25]       |
| Gold nanoparticle  | Antibody                | H3N2                    | Colorimetric detection | 7.8<br>HAU( $7.8 \times 10^5$ PFU)                               | 30min          | [26]       |
|                    | Sialic acid             | Influenza B             | Colorimetric detection | 0.156vol %<br>(512 HAU)<br>( $7.9 \times 10^4$ PFU)              | minutes        | [29]       |
|                    | 2,6Sialyllactose-levan  | H1N1                    | Colorimetric detection | $7.4 \times 10^3$ PFU                                            | 5 min          | This study |
|                    | 2,3 Sialyllactose levan | H5N2                    | Colorimetric detection | $4.2 \times 10^3$ PFU                                            | 5 min          | This study |

The approximate conversion factors are  $1 \text{ HAU} \approx 1 \times 10^5 \text{ PFU}$  and  $10^6 \text{ EID/50 mL} \approx 0.7 \times 10^6 \text{ PFU mL}^{-1}$ ,

**Table S2. An overview on recently reported nanomaterial-based optical methods for the determination of detection of influenza virus**
